# Supplementary material
Source: PubMed Central journal article supplement (PMC2700829)

# Supporting information

## Novel C-seco-taxoids possessing high potency against paclitaxel-resistant cancer cell lines overexpressing class III $\beta$ -tubulin

Antonella Pepe,<sup>a</sup> Liang Sun,<sup>a</sup> Ilaria Zanardi,<sup>b</sup> Xinyuan Wu,<sup>a</sup> Cristiano Ferlini,<sup>c</sup> Gabriele Fontana,<sup>d</sup> Ezio Bombardelli,<sup>d</sup> and Iwao Ojima<sup>a,b,\*</sup>

<sup>a</sup>Department of Chemistry, State University of New York at Stony Brook, Stony Brook, NY11794-3400, USA. <sup>b</sup>Institute of Chemical Biology & Drug Discovery, State University of New York at Stony Brook, Stony Brook, NY11794-3400, USA. <sup>c</sup>Laboratory of Antineoplastic Pharmacology, Department of Obstetrics and Gynecology, Catholic University of the Sacred Heart, Rome Italy. <sup>d</sup>Indena S.p.A. Viale Ortles 12, 20139 Milano Italy

### Contents:

|                                                                                                                                                                         |   |
|-------------------------------------------------------------------------------------------------------------------------------------------------------------------------|---|
| General Methods, Materials.....                                                                                                                                         | 3 |
| 2-Debenzoyl-2-(3-methoxybenzoyl)-10-dehydro-10-deacetyl baccatin III ( <b>4a</b> ).....                                                                                 | 3 |
| 2-Debenzoyl-2-(3-chlorobenzoyl)-7-epi-10-dehydro 10-deacetyl baccatin III` ( <b>4b</b> ).....                                                                           | 3 |
| 2-Debenzoyl-2-(3-fluorobenzoyl)-10-dehydro-10-deacetyl baccatin III ( <b>4c</b> ):                                                                                      |   |
| epimer A .....                                                                                                                                                          | 4 |
| epimer B .....                                                                                                                                                          | 4 |
| 2-Debenzoyl-2-(3-methoxybenzoyl)-10-dehydro-7-8-seco-10-deacetyl baccatin ( <b>5a</b> ):.....                                                                           | 4 |
| 2-Debenzoyl-2-(3-chlorobenzoyl)-10-dehydro-7-8-seco-10-deacetyl baccatin ( <b>5b</b> ): .....                                                                           | 4 |
| 2-Debenzoyl-2-(3-fluorobenzoyl)-10-dehydro-7-8-seco-10-deacetyl baccatin ( <b>5c</b> ): .....                                                                           | 5 |
| 2-Debenzoyl-2-(3-methoxybenzoyl)-7,9-ditriethylsilyl-10-dehydro-7-8-seco-10-deacetyl-<br>baccatin ( <b>6a</b> ): .....                                                  | 5 |
| 2-Debenzoyl-2-(3-chlorobenzoyl)-7,9-triethylsilyl-10-dehydro-7-8-seco-10-deacetyl-<br>baccatin ( <b>6b</b> ): .....                                                     | 5 |
| 2-Debenzoyl-2-(3-fluorobenzoyl)-7,9-bis(triethylsilyl)-10-dehydro-7-8-seco-10-deacetyl-<br>baccatin ( <b>6c</b> ).....                                                  | 5 |
| 2-Debenzoyl-2-(3-methoxybenzoyl)-2'-triisopropylsilyl-3'-dephenyl-3'-(2-methyl-1-propyl)-<br>7,9-bis(triethylsilyl)-10-dehydro-7-8-seco-docetaxel ( <b>7a</b> ) .....   | 6 |
| 2-Debenzoyl-2-(3-chlorobenzoyl)-2'-triisopropylsilyl-3'-dephenyl-3'-(2-methyl-1-propyl)-7,9-<br>bis(triethylsilyl)-10-dehydro-7-8-seco-docetaxel ( <b>7b</b> ) .....    | 6 |
| 2-Debenzoyl-2-(3-methoxybenzoyl)-2'-triisopropylsilyl-3'-dephenyl-3'-(2-methyl-1-propenyl)-<br>7,9-bis(triethylsilyl)-10-dehydro-7-8-seco-docetaxel ( <b>8a</b> ) ..... | 6 |
| 2-Debenzoyl-2-(3-chlorobenzoyl)-2'-triisopropylsilyl-3'-dephenyl-3'-(2-methyl-1-propenyl)-<br>7,9-bis(triethylsilyl)-10-dehydro-7-8-seco-docetaxel ( <b>8b</b> ):.....  | 7 |
| 2-Debenzoyl-2-(3-fluorobenzoyl)-2'-triisopropylsilyl-3'-dephenyl-3'-(2-methyl-1-propenyl)-<br>7,9-bis(triethylsilyl)-10-dehydro-7-8-seco-docetaxel ( <b>8c</b> ): ..... | 7 |

|                                                                                                                                  |    |
|----------------------------------------------------------------------------------------------------------------------------------|----|
| 2-Debenzoyl-2-(3-methoxybenzoyl)-3'-dephenyl-3'-(2-methyl-1-propenyl)-10-dehydro-7-8-seco-docetaxel ( <b>SB-CST-10201</b> )..... | 7  |
| 2-Debenzoyl-2-(3-methoxybenzoyl)-3'-dephenyl-3'-(2-methyl-1-propanyl)-10-dehydro-7-8-seco-docetaxel ( <b>SB-CST-10101</b> )..... | 8  |
| 2-Debenzoyl-2-(3-chlorobenzoyl)-3'-dephenyl-3'-(2-methyl-1-propyl)-10-dehydro-7-8-seco-docetaxel ( <b>SB-CST-10102</b> ) .....   | 8  |
| 2-Debenzoyl-2-(3-fluorobenzoyl)-3'-dephenyl-3'-(2-methyl-1-propyl)-10-dehydro-7-8-seco-docetaxel ( <b>SB-CST-10104</b> ) .....   | 9  |
| 2-Debenzoyl-2-(3-chlorobenzoyl)-3'-dephenyl-3'-(2-methyl-1-propenyl)-10-dehydro-7-8-seco-docetaxel, ( <b>SB-CST-10202</b> )..... | 9  |
| 2-Debenzoyl-2-(3-fluorobenzoyl)-3'-dephenyl-3'-(2-methyl-1-propenyl)-10-dehydro-7-8-seco-docetaxel ( <b>SB-CST-10204</b> ).....  | 9  |
| References.....                                                                                                                  | 10 |
| <b>Figure S1.</b> Paclitaxel, IDN-5390 and SB-CST-10202 in TBB1 and TBBsReferences .....                                         | 11 |

**General Methods.**  $^1\text{H}$  and  $^{13}\text{C}$  NMR spectra were recorded on a Bruker AC-250 MHz NMR spectrometer or a Varian 300, 400 or 500 MHz NMR spectrometers using tetramethylsilane as the internal standard. The  $^1\text{H}$  and  $^{13}\text{C}$  NMR spectra of C-seco-baccatins and C-seco-taxoids were assigned based on Appendino's attribution.<sup>1</sup> Melting points were measured on a Thomas Hoover Capillary melting point apparatus and are uncorrected. Optical rotations were measured on a Perkin-Elmer Model 241 polarimeter. Thin layer chromatography (TLC) was performed on Merck DC-alufolien with Kieselgel 60F-254. Column chromatography was carried out on silica gel 60 (Merck; 230-400 mesh ASTM). The purity of the final taxoids was analyzed by HPLC with a Shimadzu LC-2010A/2010C, using a Novapack C-18 column and acetonitrile-water (1:1) as the solvent system with a flow rate of 0.5 ml/min. Low resolution mass spectrometric analysis was carried out on an Agilent G1956 1100 Series LC-MS system. High resolution mass spectrometry (HRMS) was performed at the Mass Spectrometry Laboratory, University of Illinois at Urbana-Champaign, Urbana, IL.

**Materials.** Chemicals were purchased from Sigma Aldrich Co. or Fisher Scientific, and used as received. Tetrahydrofuran was freshly distilled from sodium/benzophenone and dichloromethane was distilled from calcium hydride immediately before use. In addition, a PureSolv<sup>TM</sup> solvent purification system SPS-400 (Innovative Technology, Inc.) was used for the purification of HPLC grade solvents. (3*R*,4*S*)-1-*tert*-Butoxycarbonyl-3-triisopropylsiloxy-4-(2-methylprop-1-enyl)azetidin-2-one (**1**)<sup>2</sup>, (3*R*,4*S*)-1-*tert*-butoxycarbonyl-3-triisopropylsiloxy-4-(2-methylpropyl)azetidin-2-one (**2**)<sup>3</sup>, 2-debenzoyl-2-(3-methoxybenzoyl)-10-deacetyl-baccatin III (**3a**)<sup>4, 5</sup>, 2-debenzoyl-2-(3-chlorobenzoyl)-10-deacetyl-baccatin III (**3b**)<sup>4, 5</sup> and 2-debenzoyl-2-(3-fluorobenzoyl)-10-deacetyl-baccatin III (**3c**)<sup>4, 5</sup> were prepared by the literature methods.

#### Synthesis of 2-debenzoyl-2-(3-methoxybenzoyl)-10-dehydro-10-deacetyl-baccatin III (**4a**).

To a solution of 2-(3-OMe-benzoyl)-DAB **3a** (606 mg 1.04 mmol) in MeOH (20 mL) was added Cu(OAc)<sub>2</sub>·H<sub>2</sub>O (630 mg, 3 equiv.). The suspension was stirred at room temperature overnight (open air). The reaction mixture was concentrated *in vacuo*, and the crude product was passed through a short silica gel column, using dichloromethane-methanol(3%) as eluant, to remove the Cu salts. Then, **4a** was collected as yellowish solid (458 mg, 77% yield as a 4:1 mixture of two epimers):  $^1\text{H}$  NMR (300 MHz, CDCl<sub>3</sub>)  $\delta$  7.74 (dt, 1 H,  $J$  = 1.2, 8 Hz, 6-H<sub>Ar</sub>), 7.70 (t, 1 H,  $J$  = 3 Hz, 2-H<sub>Ar</sub>), 7.44 (t, 1 H,  $J$  = 8 Hz, 5-H<sub>Ar</sub>), 7.20 (ddd, 1 H,  $J$  = 1.2, 3, 8 Hz, 4-H<sub>Ar</sub>), 5.83 (d, 1 H,  $J$  = 7 Hz, 2-H), 4.95 (m, 2 H, 13-H, 5-H), 4.65 (d, 1 H,  $J$  = 11 Hz, 7-H), 4.47 (d, 1 H,  $J$  = 8 Hz, 20-Ha), 4.34 (d, 1 H,  $J$  = 8 Hz, 20-Hb), 4.10 (d, 1 H,  $J$  = 7 Hz, 3-H), 3.90 (s, 3 H, OMe), 2.40 (m, 4 H, 4-Ac, 6-Ha), 2.30 (m, 2 H, 14-Ha, 14-Hb), 2.14 (m, 1 H, 6-Hb), 2.00 (d, 3 H,  $J$  = 1.5 Hz, 18-CH<sub>3</sub>), 1.70 (s, 3 H, 19-CH<sub>3</sub>), 1.10 (m, 6 H, 17-CH<sub>3</sub>, 16-CH<sub>3</sub>).

*In the same manner, 2-(3-chloro- and fluorobenzoyl) analogues, 4b and 4c, were synthesized.*

**2-Debenzoyl-2-(3-chlorobenzoyl)-7-epi-10-dehydro-10-deacetyl-baccatin III (**4b**):** 77% yield as a 4:1 mixture of two epimers;  $^1\text{H}$  NMR (500 MHz, CDCl<sub>3</sub>)  $\delta$  5.58 (d, 1 H,  $J$  = 7 Hz, H-2, epimer A), 5.52 (d, 1 H,  $J$  = 7 Hz, H-2, epimer B), 4.97-4.89 (m, 4 H, H-13 +H-5 epimer A, H-13 +H-5 epimer B), 4.63 (d, 1 H,  $J$  = 11 Hz 7-H), 4.58 (d, 1 H,  $J$  = 8 Hz, H-20 epimer A), 4.49 (d, 1 H,  $J$  = 8 Hz, H-20 epimer B), 4.28 (d, 1 H,  $J$  = 8 Hz, H-20 epimer A), 4.13 (m, 1 H,  $J$  = 8 Hz, H-20 epimer B), 4.03 (dd, 1 H,  $J$  = 7, 11 Hz, H-7), 3.53 (d, 1 H,  $J$  = 7 Hz, H-3), 2.60 (m, 1H), 2.2-1.0 (m, 20 H for both epimers).

**2-Debenzoyl-2-(3-fluorobenzoyl)-10-dehydro-10-deacetylbaecatin III (4c):** 86 % yield; a yellowish solid, a 4:1 mixture of epimers:

**Epimer A** (less polar epimer).  $^1\text{H}$  NMR (300 MHz  $\text{CDCl}_3$ )  $\delta$  7.99 (d, 1 H,  $J = 8$  Hz, 6- $\text{H}_{\text{Ar}}$ ), 7.84 (m, 1 H, 2- $\text{H}_{\text{Ar}}$ ), 7.56 (m, 1 H, 5- $\text{H}_{\text{Ar}}$ ), 7.41 (m, 1 H, 4- $\text{H}_{\text{Ar}}$ ), 5.85 (d, 1 H,  $J = 7$  Hz, 2-H), 5.00 (m, 2 H, 5-H, 13-H), 4.69 (d, 1 H,  $J = 11$  Hz, 7-H), 4.47 (d, 1 H,  $J = 8$  Hz, 20-Ha), 4.35 (d, 1 H,  $J = 8$  Hz, 20-Hb), 4.15 (d, 1 H,  $J = 7$  Hz, 3-H), 3.88 (m, 1 H, OH), 2.44 (s, 3 H, 4-Ac), 2.40 (m, 1 H, 6-Ha), 2.32 (m, 2 H, 14-Ha, 14-Hb), 2.00 (s, 4 H, 18- $\text{CH}_3$ , 6-Hb), 1.75 (s, 3 H, 19- $\text{CH}_3$ ), 1.14 (s, 3 H, 16- $\text{CH}_3$ ), 1.12 (s, 3 H, 17- $\text{CH}_3$ );  $^{13}\text{C}$  NMR (75 MHz  $\text{CDCl}_3$ )  $\delta$  208.6 (9-C), 196.4 (10-C), 172.7 (4-Ac), 166.1 (2-benz), 163.0 (d,  $J_{\text{CF}} = 246$  Hz, CF), 147.0 (12-C), 140.7 (11-C), 131.7 ( $J_{\text{CF}} = 7$  Hz, 1- $\text{C}_{\text{Ar}}$ ), 130.7 ( $J_{\text{CF}} = 8$  Hz, 5- $\text{CH}_{\text{Ar}}$ ), 126.2 ( $J_{\text{CF}} = 3$  Hz, 6- $\text{CH}_{\text{Ar}}$ ), 121.4 ( $J_{\text{CF}} = 21$  Hz, 4- $\text{CH}_{\text{Ar}}$ ), 117.3 ( $J_{\text{CF}} = 23$  Hz, 2- $\text{CH}_{\text{Ar}}$ ), 82.8 (5-CH), 81.5 (4-C), 79.4 (1-C), 77.3 (7-CH), 76.9 (20- $\text{CH}_2$ ), 75.7 (2-CH), 67.7 (13-CH), 57.6 (8-C), 40.0 (15-C), 39.9 (3-CH), 39.1 (14- $\text{CH}_2$ ), 35.6 (6- $\text{CH}_2$ ), 26.6 (16- $\text{CH}_3$ ), 22.7 (4-Ac), 22.3 (17- $\text{CH}_3$ ), 15.2 (18- $\text{CH}_3$ ), 14.8 (19- $\text{CH}_3$ ).

**Epimer B** (more polar epimer).  $^1\text{H}$  NMR (300 MHz  $\text{CDCl}_3$ )  $\delta$  7.98 (m, 1 H, 6- $\text{H}_{\text{Ar}}$ ), 7.80 (m, 1 H, 2- $\text{H}_{\text{Ar}}$ ), 7.56 (m, 1 H, 5- $\text{H}_{\text{Ar}}$ ), 7.40 (m, 1 H, 4- $\text{H}_{\text{Ar}}$ ), 5.80 (d, 1 H,  $J = 7$  Hz, 2-H), 5.03 (m, 2 H, 5-H, 13-H), 4.39 (d, 1 H,  $J = 8$  Hz, 20-Ha), 4.21 (d, 1 H,  $J = 8$  Hz, 20-Hb), 4.14 (dd, 1 H,  $J = 7, 10$  Hz, 7-H), 4.13 (d, 1 H,  $J = 7$  Hz, 3-H), 2.60 (m, 1 H, 6-Ha), 2.42 (m, 2 H, 14-Ha, 14-Hb), 2.39 (s, 3 H, 4-Ac), 1.90 (m, 2 H, 6-Hb, OH), 1.78 (s, 3 H, 19- $\text{CH}_3$ ), 1.27 (s, 3 H, 17- $\text{CH}_3$ ), 1.21 (s, 3 H, 16- $\text{CH}_3$ );  $^{13}\text{C}$  NMR (75 MHz  $\text{CDCl}_3$ )  $\delta$ , 206.8 (9-C), 194.4 (10-C), 170.7 (4-Ac), 166.0 (2-benz.), 163.0 ( $J_{\text{CF}} = 246$  Hz, CF), 150.7 (12-C), 141.4 (11-C), 131.7 (1- $\text{C}_{\text{Ar}}$ ), 130.6 (d,  $J_{\text{CF}} = 8$  Hz, 5- $\text{CH}_{\text{Ar}}$ ), 126.1 (d,  $J_{\text{CF}} = 3$  Hz, 6- $\text{CH}_{\text{Ar}}$ ), 121.1 (d,  $J_{\text{CF}} = 21$  Hz, 4- $\text{CH}_{\text{Ar}}$ ), 117.2 (d,  $J_{\text{CF}} = 23$  Hz, 2- $\text{CH}_{\text{Ar}}$ ), 84.5 (5-CH), 80.5 (4-C), 79.5 (1-C), 76.1 (20- $\text{CH}_2$ ), 75.2 (2-CH), 69.0 (7-CH), 68.3 (13-CH), 58.7 (8-C), 45.9 (3-C), 40.6 (15-C), 38.6 (14- $\text{CH}_2$ ), 35.8 (6- $\text{CH}_2$ ), 27.1 (16- $\text{CH}_3$ ), 23.4 (4-Ac), 22.6 (17- $\text{CH}_3$ ), 14.6 (18- $\text{CH}_3$ ), 8.4 (19- $\text{CH}_3$ ).

### Synthesis of 2-debenzoyl-2-(3-methoxybenzoyl)-10-dehydro-7-8-seco-10-deacetylbaecatin (5a).

L-selectride (1M solution in THF, 4 eq) was added, dropwise to a solution of 10-oxo-2-*m*-OMe-benzoyl-DAB (**4a**) (130 mg, 0.227 mmol) in THF (2.5 mL) at  $-70$  °C. After 10 min, the reaction was quenched by addition of ethyl acetate (2.5 mL) and a 2 *N*  $\text{H}_2\text{SO}_4$  (1.0 mL). The reaction mixture was extracted with ethyl acetate and the combined organic phases were washed with a saturated aqueous  $\text{NaHCO}_3$  and brine. The resulting solution was dried over anhydrous  $\text{MgSO}_4$  and the solvent evaporated under reduced pressure to give a crude product. The crude product was purified on a short silica gel column, using dichloromethane/methanol(3%) as eluant to afford **5a** (90 mg, 70% yield) as a white solid:  $^1\text{H}$  NMR (400 MHz  $\text{CDCl}_3$ )  $\delta$  7.60 (m, 2 H, 6, 2- $\text{H}_{\text{Ar}}$ ), 7.37 (t, 1 H,  $J = 7$  Hz, 5- $\text{H}_{\text{Ar}}$ ), 7.10 (m, 1 H, 4- $\text{H}_{\text{Ar}}$ ), 6.48 (s, 1 H, 9-OH), 5.55 (d, 1 H,  $J = 9$  Hz, 2-H), 5.20 (m, 2 H, 5-H, 20-Ha), 4.90 (m, 1 H, 13-H), 4.40-4.20 (m, 2 H, 3-H, 20-Hb), 3.85 (s, 3 H, OMe), 3.80-3.60 (m, 2 H, 7-Ha, 7-Hb), 3.20 (m, 1 H, 14-Ha), 2.7-1.6 (m, 12 H, 6-Ha, 14-Hb, 6-Hb, 4-Ac, 18- $\text{CH}_3$ , 19- $\text{CH}_3$ ), 1.12 (s, 3 H, 17- $\text{CH}_3$ ), 1.05 (s, 3 H, 16- $\text{CH}_3$ ).

*In the same manner, 2-(3-chloro- and fluorobenzoyl) analogues, 5b and 5c, were synthesized.*

**2-Debenzoyl-2-(3-chlorobenzoyl)-10-dehydro-7-8-seco-10-deacetylbaecatin (5b):** 70% yield; white solid; mp 156-158 °C;  $[\alpha]_{\text{D}}^{25}$  63° (c 0.43,  $\text{CHCl}_3$ );  $^1\text{H}$  NMR (400 MHz  $\text{CDCl}_3$ )  $\delta$  8.90 (m, 2 H, arom), 7.60 (m, 1 H, arom), 7.40 (m, 1 H, arom), 6.52 (s, 1 H, 9-OH), 5.58 (bd, 1 H, 2-H), 5.20 (bs, 1 H, 5-H), 4.90 (m, 2 H, 20-Ha, 13-H), 4.30 (m, 2 H, 3-H, 20-Hb), 3.70 (m, 2 H, 7-Ha, 7-Hb), 1.70-2.80 (m, 14 H, 14-Ha, 6-Ha, 14-Hb, 6-Hb, 4-Ac, 18- $\text{CH}_3$ , 19- $\text{CH}_3$ , OH), 1.20 (s, 3 H, 16- $\text{CH}_3$ ), 1.12 (s, 3 H, 17- $\text{CH}_3$ );  $^{13}\text{C}$  NMR (100 MHz  $\text{CDCl}_3$ )  $\delta$  192.0 (10-C), 170.0 (4-Ac), 166.0 (2-benz), 149.1 (9-C), 141.3 (11-C), 141.2 (12-C), 135.2 (4- $\text{CH}_{\text{Ar}}$ ), 134.0 (3- $\text{C}_{\text{Ar}}$ ), 131.5 (1- $\text{C}_{\text{Ar}}$ ), 130.4 (2- $\text{CH}_{\text{Ar}}$ ), 129.7 (5- $\text{CH}_{\text{Ar}}$ ), 127.9 (6-

CH<sub>Ar</sub>), 123.9 (8-CH), 87.2 (5-CH), 86.6 (4-C), 80.1 (1-C), 75.3 (20-CH<sub>2</sub>), 75.2 (2-CH), 67.3 (13-CH), 59.5 (7-CH), 44.5 (3-CH), 42.9 (15-C), 39.8 (14-CH<sub>2</sub>), 38.2 (6-CH<sub>2</sub>), 25.3 (16-CH<sub>3</sub>), 22.4 (4-Ac), 21.0 (17-CH<sub>3</sub>), 14.7 (18-CH<sub>3</sub>), 14.6 (19-CH<sub>3</sub>).

**2-Debenzoyl-2-(3-fluorobenzoyl)-10-dehydro-7-8-seco-10-deacetylbaecatin (5c):** 50% yield; white solid; <sup>1</sup>H NMR (400 MHz CDCl<sub>3</sub>) δ 7.80 (m, 1 H, arom), 7.60 (m, 1 H, arom), 7.40 (m, 1 H, arom), 7.30 (m, 1 H, arom), 6.52 (s, 1 H, 9-OH), 5.54 (d, *J* = 9 Hz, 2-H), 5.10 (bs, 2 H, 5-H, 20-Ha), 4.90 (m, 1 H, 13-H), 4.29 (m, 2 H, 20-Hb, 3-H), 3.70 (m, 2 H, 7-Ha, 7-Hb), 1.80-2.80 (m, 14 H, 14-Ha, 6-Ha, 14-Hb, 6-Hb, 4-Ac, 18-CH<sub>3</sub>, 19-CH<sub>3</sub>, OH), 1.10 (s, 3 H, 16-CH<sub>3</sub>), 1.04 (s, 3 H, 17-CH<sub>3</sub>); <sup>13</sup>C NMR (100 MHz CDCl<sub>3</sub>) δ 192.1 (10-C), 169.2 (4-Ac), 166.0 (2-benz.), 163.0 (d, *J*<sub>CF</sub> = 247 Hz, CF<sub>Ar</sub>), 149.0 (9-C), 141.1 (11-C), 140.0 (12-C), 131.9 (d, *J*<sub>CF</sub> = 7 Hz, 1-C<sub>Ar</sub>), 130.8 (5-CH<sub>Ar</sub>), 125.4 (8-C), 123.4 (6-CH<sub>Ar</sub>), 121.2 (d, *J*<sub>CF</sub> = 21 Hz, 4-CH<sub>Ar</sub>), 116.7 (2-CH<sub>Ar</sub>), 87.0 (5-CH), 86.5 (4-C), 80.6 (1-C), 76.9 (20-CH<sub>2</sub>), 75.4 (2-CH), 67.1 (13-CH), 59.2 (7-C), 44.5 (3-CH), 42.8 (15-C), 39.8 (14-CH<sub>2</sub>), 39.7 (6-CH<sub>2</sub>), 25.3 (16-CH<sub>3</sub>), 22.4 (4-Ac), 21.1 (17-CH<sub>3</sub>), 14.5 (18-CH<sub>3</sub>), 11.1 (19-CH<sub>3</sub>).

### Synthesis of 2-debenzoyl-2-(3-methoxybenzoyl)-7,9-ditriethylsilyl-10-dehydro-7-8-seco-10-deacetylbaecatin (6a).

Chloroethylsilane (147 μL, 0.88 mmol) and methylimidazole (80 μL, 1.0 mmol) were added dropwise to a solution of **5a** (230 mg, 0.40 mmol) in freshly distilled DMF (0.133 M) at 0 °C and the mixture was stirred at 0 °C for 40 min in an ice/water bath. The reaction mixture was washed with a saturated aqueous solution of ammonium chloride and extracted with ethyl acetate. The combined organic phases were washed with water and brine, and dried over anhydrous MgSO<sub>4</sub>. The solvent was evaporated under reduced pressure and the crude product was purified on a silica gel column using a mixture of petroleum ether and ethyl ether (1:1) to afford **6a** (217 mg, 67 % yield) as a white solid: <sup>1</sup>H NMR (400 MHz, CDCl<sub>3</sub>) δ 7.60 (m, 2 H, 6, 2-H<sub>Ar</sub>), 7.37 (t, 1 H, *J* = 7 Hz, 5-H<sub>Ar</sub>), 7.10 (m, 1 H, 4-H<sub>Ar</sub>), 5.55 (d, 1 H, *J* = 9 Hz, 2-H), 5.20 (m, 2 H, 5-H, 20-Ha), 4.90 (m, 1 H, 13-H), 4.40 (m, 1 H, 3-H), 4.20 (m, 1 H, 20-Hb), 3.85 (s, 3 H, OMe), 3.80 (m, 1 H, 7-Ha), 3.60 (m, 1 H, 7-Hb), 2.70-2.10 (m, 3 H, 14-Ha, 6-Ha, 14-Hb), 2.00-1.40 (m, 10 H, 4-Ac, 6-Hb, 18-CH<sub>3</sub>, 19-CH<sub>3</sub>), 1.24 (s, 3 H, 17-CH<sub>3</sub>), 1.10 (m, 3 H, 16-CH<sub>3</sub>) 0.90 (m, 18 H, 2\*Si(CH<sub>2</sub>CH<sub>3</sub>)<sub>3</sub>), 0.80 (m, 6 H, Si(CH<sub>2</sub>CH<sub>3</sub>)<sub>3</sub>), 0.60 (m, 6 H, Si(CH<sub>2</sub>CH<sub>3</sub>)<sub>3</sub>).

*In the same manner, 2-(3-chloro- and fluorobenzoyl) analogues, 6b and 6c, were synthesized.*

**2-Debenzoyl-2-(3-chlorobenzoyl)-7,9-triethylsilyl-10-dehydro-7-8-seco-10-deacetylbaecatin (6b):** 50 % yield; <sup>1</sup>H NMR (400 MHz, CDCl<sub>3</sub>) δ 8.00 (bs, 2 H, 2, 6-H<sub>Ar</sub>), 7.60 (d, 1 H, *J* = 6 Hz, 4-H<sub>Ar</sub>), 7.40 (t, 1 H, *J* = 6 Hz 5-H<sub>Ar</sub>), 5.60 (bd, 1 H, *J* = 7 Hz 2-H), 5.40-5.20 (m, 2 H, 5-H, 20-Ha), 4.95 (m, 1 H, 13-H), 4.20 (m, 2 H, 3-H, 20-Hb), 3.90-3.60 (m, 2 H, 7-Ha, 7-Hb), 2.70 (m, .60 (m, 10 H, 6-Hb, 18-CH<sub>3</sub>, 4-Ac, 19-CH<sub>3</sub>), 1.10 (s, 3 H, 17-CH<sub>3</sub>), 1.15 (s, 3 H, 16-CH<sub>3</sub>), 0.90 (m, 18 H, 2\*Si(CH<sub>2</sub>CH<sub>3</sub>)<sub>3</sub>), 0.75 (m, 6 H, Si(CH<sub>2</sub>CH<sub>3</sub>)<sub>3</sub>), 0.60 (m, 6 H, Si(CH<sub>2</sub>CH<sub>3</sub>)<sub>3</sub>); <sup>13</sup>C NMR (100 MHz, CDCl<sub>3</sub>) δ 192.3 (10-C), 172.2 (4-Ac), 166.0 (2-benz.), 149.0 (9-C), 142.7 (11-C), 137.0 (12-C), 135.2 (4-CH<sub>Ar</sub>), 133.0 (3-C<sub>Ar</sub>), 131.6 (1-C<sub>Ar</sub>), 130.4 (2-CH<sub>Ar</sub>), 129.7 (5-CH<sub>Ar</sub>), 128.0 (6-CH<sub>Ar</sub>), 87.2 (5-CH), 86.6 (4-C), 80.1 (1-C), 76.9 (20-CH<sub>2</sub>) 75.2 (2-CH), 68.1 (13-CH), 57.6 (7-CH<sub>2</sub>), 51.4 (3-CH), 42.7 (15-C), 41.1 (6-CH), 35.7 (14-CH<sub>2</sub>), 26.6 (16-CH<sub>3</sub>), 22.3 (4-Ac), 21.9 (17-CH<sub>3</sub>), 15.1 (18-CH<sub>3</sub>), 13.1 (19-CH<sub>3</sub>), 7.2 ((Si(CH<sub>2</sub>CH<sub>3</sub>)<sub>3</sub>), 7.1 (Si(CH<sub>2</sub>CH<sub>3</sub>)<sub>3</sub>), 6.4 (Si(CH<sub>2</sub>CH<sub>3</sub>)<sub>3</sub>), 5.0 (Si(CH<sub>2</sub>CH<sub>3</sub>)<sub>3</sub>). MS-ES<sup>+</sup> (*m/z*): calcd for C<sub>41</sub>H<sub>63</sub>ClO<sub>10</sub>Si<sub>2</sub>H<sup>+</sup> 807.36; found 807.4.

**2-Debenzoyl-2-(3-fluorobenzoyl)-7,9-bis(triethylsilyl)-10-dehydro-7-8-seco-10-deacetylbaecatin (6c):** white solid; 52 % yield; <sup>1</sup>H NMR (400 MHz, CDCl<sub>3</sub>) δ 7.80 (m, 1 H, arom), 7.70 (m, 1 H, arom), 7.50 (m, 1 H, arom), 7.35 (m, 1 H, arom), 5.58 (d, 1 H, *J* = 9 Hz, 2-H), 5.20 (bs, 1 H, 5-H), 4.90 (m, 2 H, 20-Ha, 13-H), 4.20 (m, 2 H, 20-Hb, 3-H), 3.80 (m, 1 H, 7-Ha), 3.60 (m, 1 H, 7-Hb), 1.70-2.60 (m, 14 H,

14-Ha, 6-Ha, 14-Hb, 6-Hb, 4-Ac, 18-CH<sub>3</sub>, 19-CH<sub>3</sub>, OH), 1.15 (s, 3 H, 16-CH<sub>3</sub>), 1.10 (s, 3 H, 17-CH<sub>3</sub>), 0.95 (m, 18 H, 2\*Si(CH<sub>2</sub>CH<sub>3</sub>)<sub>3</sub>), 0.80 (m, 6 H, Si(CH<sub>2</sub>CH<sub>3</sub>)<sub>3</sub>), 0.60 (m, 6 H, Si(CH<sub>2</sub>CH<sub>3</sub>)<sub>3</sub>).

**Synthesis of 2-debenzoyl-2-(3-methoxybenzoyl)-2'-triisopropylsilyl-3'-dephenyl-3'-(2-methyl-1-propyl)-7,9-ditriethylsilyl-10-dehydro-7-8-seco-docetaxel (7a).**

LiHMDS (1M solution in THF, 279  $\mu$ L, 1.5 equiv) was added to a solution of 7-9-diTES-*m*-OMe-benzoyl-DAB **6a** (147 mg, 0.177 mmol) and  $\beta$ -lactam **2** (106 mg, 1.5 eq) in THF (20 mL) at -40 °C and the mixture was stirred for 30 min at the same temperature. The reaction was quenched with brine, extracted with ethyl acetate, and the organic layer was dried over anhydrous MgSO<sub>4</sub>. The crude mixture was purified by column chromatography on silica gel using hexanes/ethyl acetate (6/1) as eluant to afford **7a** (168 mg, 80 % yield) as a white solid: <sup>1</sup>H NMR (400 MHz CDCl<sub>3</sub>)  $\delta$  7.60 (m, 1 H, 6-H<sub>Ar</sub>), 7.50 (m, 1 H, 2-H<sub>Ar</sub>), 7.40 (t, 1 H, *J* = 8 Hz, 5-H<sub>Ar</sub>), 7.15 (ddd, 1 H, *J* = 1.2, 3, 8 Hz, 4-H<sub>Ar</sub>), 6.05 (m, 1 H, 13-H), 5.60 (d, 1 H, *J* = 9 Hz, 5-H), 5.30 (m, 1 H, 2-H), 5.20 (m, 1 H, 20-Ha), 4.65 (d, 1H, *J* = 10 Hz, NH), 4.37 (m, 1 H, 2'-H), 4.30-4.10 (m, 3 H, 3-H, 20-Hb, 3'-H), 3.85 (s, 3 H, OMe), 3.70 (m, 2 H, 7-Ha, 7-Hb), 2.40 (m, 2 H, 14-Ha, 6-Ha), 1.80-1.60 (m, 14 H, 14-Hb, 6-Hb, 4-Ac, 18-CH<sub>3</sub>, 19-CH<sub>3</sub>, 5'-CH, 4'-Ha, 4'-Hb), 1.30 (s, 9 H, Boc), 1.20 (s, 3 H, 17-CH<sub>3</sub>), 1.14 (s, 3 H, 16-CH<sub>3</sub>), 0.99 (m, 27 H, 6'-CH<sub>3</sub>, 7'-CH<sub>3</sub>, TIPS), 0.95 (m, 18 H, 2\*Si(CH<sub>2</sub>CH<sub>3</sub>)<sub>3</sub>), 0.70 (m, 6 H, Si(CH<sub>2</sub>CH<sub>3</sub>)<sub>3</sub>), 0.55 (m, 6 H, Si(CH<sub>2</sub>CH<sub>3</sub>)<sub>3</sub>); <sup>13</sup>C NMR (100 MHz CDCl<sub>3</sub>)  $\delta$  191.8 (10-C), 172.1 (1'-C), 169.2 (4-Ac), 168.9 (2-benz.), 159.9 (3-C<sub>Ar</sub>), 155.8 (NCCO), 149.0 (9-C), 142.4 (11-C), 137.1 (12-C), 131.0 (1-C<sub>Ar</sub>), 129.9 (5-CH<sub>Ar</sub>), 124.6 (8-C), 122.1 (6-CH<sub>Ar</sub>), 120.1 (4-CH<sub>Ar</sub>), 114.7 (2-CH<sub>Ar</sub>), 87.5 (5-CH), 85.8 (4-C), 80.6 (1-C), 79.4 (C, Boc), 75.2 (20-CH<sub>2</sub>), 74.9 (2-CH), 73.8 (2'-CH), 71.1 (13-CH), 60.0 (7-CH<sub>2</sub>), 55.6 (OMe), 52.4 (3'-CH), 44.6 (3-CH), 43.1 (15-C), 42.4 (4'-CH<sub>2</sub>), 37.7 (6-CH<sub>2</sub>), 36.6 (14-CH<sub>2</sub>), 28.4 (CH<sub>3</sub>, Boc), 25.0 (5'-CH), 23.4 (17-CH<sub>3</sub>), 22.5 (6'-CH<sub>3</sub>), 22.4 (7'-CH<sub>3</sub>), 22.2 (4-Ac), 21.8 (16-CH<sub>3</sub>), 18.3 (SiCH(CH<sub>3</sub>)<sub>2</sub>), 14.8 (18-CH<sub>3</sub>), 14.6 (19-CH<sub>3</sub>), 12.9 (SiCH(CH<sub>3</sub>)<sub>2</sub>), 7.2 (Si(CH<sub>2</sub>CH<sub>3</sub>)<sub>3</sub>), 6.9 (Si(CH<sub>2</sub>CH<sub>3</sub>)<sub>3</sub>), 6.4 (Si(CH<sub>2</sub>CH<sub>3</sub>)<sub>3</sub>), 4.5 (Si(CH<sub>2</sub>CH<sub>3</sub>)<sub>3</sub>).

*In the same manner, 2-(3-chlorobenzoyl) analogue 7b was synthesized.*

**2-Debenzoyl-2-(3-chlorobenzoyl)-2'-triisopropylsilyl-3'-dephenyl-3'-(2-methyl-1-propyl)-7,9-ditriethylsilyl-10-dehydro-7-8-seco-docetaxel (7b):** 75% yield; white solid; <sup>1</sup>H NMR (400 MHz, CDCl<sub>3</sub>)  $\delta$  8.14 (m, 1 H, 2-H<sub>Ar</sub>), 8.00 (m, 1 H, 6-H<sub>Ar</sub>), 7.60 (m, 1 H, 4-H<sub>Ar</sub>), 7.44 (m, 1 H, 5-H<sub>Ar</sub>), 6.03 (m, 1 H, 13-H), 5.57 (d, *J* = 9 Hz, 2-H), 5.30 (m, 1 H, 5-H), 4.66 (d, 1 H, NH), 4.50-4.10 (m, 2'-H, 3'-H, 20-Ha, 20-Hb), 3.70 (m, 2 H, 7-Ha, 7-Hb), 2.80-1.80 (m, 13 H, 14-Ha, 6-Ha, 14-Hb, 6-Hb, 4-Ac, 19-CH<sub>3</sub>, 18-CH<sub>3</sub>), 1.70-1.40 (m, 3 H, 5'-H, 4'-Ha, 4'-Hb), 1.30 (s, 9 H, Boc), 1.20 (s, 3 H, 17-CH<sub>3</sub>), 1.13 (s, 3 H, 16-CH<sub>3</sub>), 1.10 (m, 27 H, 7'-CH<sub>3</sub>, 6'-CH<sub>3</sub>, TIPS), 0.90 (m, 18 H, 2\*Si(CH<sub>2</sub>CH<sub>3</sub>)<sub>3</sub>), 0.70 (m, 6 H, Si(CH<sub>2</sub>CH<sub>3</sub>)<sub>3</sub>), 0.56 (m, 6 H, Si(CH<sub>2</sub>CH<sub>3</sub>)<sub>3</sub>); <sup>13</sup>C NMR (100 MHz, CDCl<sub>3</sub>)  $\delta$  191.7 (10-C), 172.1 (1'-C), 168.8 (4-Ac), 167.0 (2-benz.), 155.8 (NCOO), 150.4 (9-C), 143.6 (11-C), 137.0 (12-C), 136.6 (4-CH<sub>Ar</sub>), 135.0 (3-CH<sub>Ar</sub>), 133.6 (1-C<sub>Ar</sub>), 131.6 (2-CH<sub>Ar</sub>), 130.2 (5-CH<sub>Ar</sub>), 129.4 (6-CH<sub>Ar</sub>), 125.8 (8-C), 88.5 (5-CH), 87.6 (4-C), 82.0 (1-C), 81.5 (C, Boc), 76.9 (20-CH<sub>2</sub>), 76.5 (2-CH), 74.9 (2'-CH), 71.0 (13-CH), 61.2 (7-CH<sub>2</sub>), 52.4 (3'-CH), 46.0 (3-CH), 43.1 (15-C), 42.4 (6-CH<sub>2</sub>), 36.6 (14-CH<sub>2</sub>), 28.4 (CH<sub>3</sub>, Boc), 25.0 (6'-CH<sub>3</sub>), 23.4 (7'-CH<sub>3</sub>), 22.8 (17-CH<sub>3</sub>), 22.4 (4-Ac), 21.8 (16-CH<sub>3</sub>), 18.3 (SiCH(CH<sub>3</sub>)<sub>2</sub>), 14.7 (18-CH<sub>3</sub>), 14.5 (19-CH<sub>3</sub>), 12.9 (SiCH(CH<sub>3</sub>)<sub>2</sub>), 7.2 (Si(CH<sub>2</sub>CH<sub>3</sub>)<sub>3</sub>), 6.9 (Si(CH<sub>2</sub>CH<sub>3</sub>)<sub>3</sub>), 6.4 (Si(CH<sub>2</sub>CH<sub>3</sub>)<sub>3</sub>), 4.5 (Si(CH<sub>2</sub>CH<sub>3</sub>)<sub>3</sub>).

**2-Debenzoyl-2-(3-methoxybenzoyl)-2'-triisopropylsilyl-3'-dephenyl-3'-(2-methyl-1-propenyl)-7,9-bis(triethylsilyl)-10-dehydro-7-8-seco-docetaxel (8a)**

LiHMDS (1.0 M in THF, 0.68 mL, 0.68 mmol) was added to a solution of **6a** (355 mg, 0.45 mmol) and  $\beta$ -lactam **1** (270 mg, 0.68 mmol) in THF cooled to -40 °C with a dry ice/acetone bath. After 1 h, the

reaction was quenched with 30 mL of a saturated aqueous solution of  $\text{NH}_4\text{Cl}$ . The aqueous layer was extracted for 3 times with 20 mL of EtOAc. The combined organic layers were dried over anhydrous  $\text{MgSO}_4$ , and concentrated *in vacuo*. Column chromatography of the residue on silica gel (hexanes/EtOAc = 15/1 to 5/1) afforded **8a** as a white solid in 71 % yield:  $^1\text{H}$  NMR (400 MHz  $\text{CDCl}_3$ )  $\delta$  7.60 (m, 2 H, 6, 2- $\text{H}_{\text{Ar}}$ ), 7.32 (m, 1 H, 5- $\text{H}_{\text{Ar}}$ ), 7.10 (m, 1 H, 4- $\text{H}_{\text{Ar}}$ ), 6.05 (m, 1 H, 13-H), 5.60 (d, 1 H,  $J = 9$  Hz, 2-H), 5.30 (d, 1 H,  $J = 9$  Hz, 5-H), 4.80 (m, 3 H, NH, 4'-H, 20-Ha), 4.40-4.10 (m, 4 H, 2'-H, 3-H, 20-Hb, 3'-H), 3.85 (s, 3 H, OMe), 3.70 (bs, 2 H, 7-Ha, 7-Hb), 2.40 (bs, 2 H, 14-Ha, 6-Ha), 2.20-1.70 (m, 11 H, 14-Hb, 6-Hb, 4-Ac, 18- $\text{CH}_3$ , 19- $\text{CH}_3$ ), 1.31 (s, 9 H, Boc), 1.20 (s, 3 H, 17- $\text{CH}_3$ ), 1.13 (s, 3 H, 16- $\text{CH}_3$ ), 1.08 (m, 27 H, 6'- $\text{CH}_3$ , 7'- $\text{CH}_3$ , TIPS), 0.90 (m, 18 H, 2\* $\text{Si}(\text{CH}_2\text{CH}_3)_3$ ), 0.70 (m, 6 H,  $\text{Si}(\text{CH}_2\text{CH}_3)_3$ ), 0.60 (m, 6 H,  $\text{Si}(\text{CH}_2\text{CH}_3)_3$ );  $^{13}\text{C}$  NMR (100 MHz  $\text{CDCl}_3$ )  $\delta$  191.9 (10-C), 171.7 (1'-C), 169.0 (4-Ac), 167.5 (2-benz.), 159.9 (3- $\text{C}_{\text{Ar}}$ ), 155.4 (NCOO), 149.0 (9-C), 144.4 (11-C), 137.0 (12-C), 135.7 (4'-C), 131.0 (1- $\text{C}_{\text{Ar}}$ ), 129.9 (5- $\text{CH}_{\text{Ar}}$ ), 124.6 (8-C), 122.9 (6- $\text{CH}_{\text{Ar}}$ ), 122.1 (5'-C), 119.9 (4- $\text{CH}_{\text{Ar}}$ ), 114.9 (2- $\text{CH}_{\text{Ar}}$ ), 87.5 (5-CH), 85.8 (4-C), 80.6 (1-C), 79.6 (C, Boc), 75.5 (20- $\text{CH}_2$ ), 74.9 (2-CH), 73.8 (2'-CH), 71.3 (13-CH), 60.0 (7- $\text{CH}_2$ ), 55.6 (OMe), 52.6 (3'-CH), 44.6 (3-CH), 43.1 (15-C), 37.7 (6- $\text{CH}_2$ ), 36.6 (14- $\text{CH}_2$ ), 28.4 ( $\text{CH}_3$ , Boc), 25.8 (17- $\text{CH}_3$ ), 22.5 (6'- $\text{CH}_3$ ), 22.4 (4-Ac), 21.9 (16- $\text{CH}_3$ ), 18.6 ( $\text{SiCH}(\text{CH}_3)_2$ ), 14.8 (18- $\text{CH}_3$ ), 13.0 (19- $\text{CH}_3$ ), 12.7 ( $\text{SiCH}(\text{CH}_3)_2$ ), 7.2 ( $\text{Si}(\text{CH}_2\text{CH}_3)_3$ ), 6.9 ( $\text{Si}(\text{CH}_2\text{CH}_3)_3$ ), 6.4 ( $\text{Si}(\text{CH}_2\text{CH}_3)_3$ ), 4.5 ( $\text{Si}(\text{CH}_2\text{CH}_3)_3$ ).

*In the same manner, 2-(3-chloro- and fluorobenzoyl) analogues 8b and 8c were synthesized.*

**2-Debenzoyl-2-(3-chlorobenzoyl)-2'-triisopropylsilyl-3'-dephenyl-3'-(2-methyl-1-propenyl)-7,9-ditriethylsilyl-10-dehydro-7-8-seco-docetaxel (8b):** 74% yield; white solid;  $^1\text{H}$  NMR (300 MHz,  $\text{CDCl}_3$ )  $\delta$  8.14 (m, 1 H, 2- $\text{H}_{\text{Ar}}$ ), 8.00 (m, 1 H, 6- $\text{H}_{\text{Ar}}$ ), 7.63 (m, 1 H, 4- $\text{H}_{\text{Ar}}$ ), 7.44 (m, 1 H, 5- $\text{H}_{\text{Ar}}$ ), 6.10 (m, 1 H, H-13), 5.64 (d, 1 H,  $J = 9$  Hz, 2-H), 5.40 (m, 2 H,  $J = 8$  Hz, 5-H, 20-Ha), 5.00 (m, 3 H, 3'-H, 4'-H, NH), 4.40-4.20 (bs, 3 H, 2'-H, 20-Hb, 3-H), 3.8 (m, 2 H, 7-Ha, 7-Hb), 2.60-2.20 (m, 4 H, 6-Ha, 6-Hb, 14-Ha, 14-Hb), 1.85 (m, 6 H, 19- $\text{CH}_3$ , 4-Ac), 1.79 (s, 3 H, 18- $\text{CH}_3$ ), 1.39 (s, 9 H, Boc), 1.28 (s, 3 H, 17- $\text{CH}_3$ ), 1.20 (s, 16- $\text{CH}_3$ ), 1.15 (m, 21 H, TIPS), 0.90 (m, 24 H, 7'- $\text{CH}_3$ , 6'- $\text{CH}_3$ , 2\* $\text{Si}(\text{CH}_2\text{CH}_3)_3$ ), 0.80 (m, 6 H,  $\text{Si}(\text{CH}_2\text{CH}_3)_3$ ), 0.60 (m, 6 H,  $\text{Si}(\text{CH}_2\text{CH}_3)_3$ ).

**2-Debenzoyl-2-(3-fluorobenzoyl)-2'-triisopropylsilyl-3'-dephenyl-3'-(2-methylprop-1-enyl)-7,9-ditriethylsilyl-10-dehydro-7-8-seco-docetaxel (8c):** 78% yield; white solid;  $^1\text{H}$  NMR (400 MHz,  $\text{CDCl}_3$ )  $\delta$  0.57 (m, 6 H), 0.75 (m, 6 H), 0.89 (m, 9 H), 0.95 (m, 9 H), 1.04 (m, 4 H), 1.13 (s, 2 H), 1.21 (s, 2 H), 1.26 (m, 2 H), 1.32 (s, 9 H), 1.73 (s, 2 H), 1.79 (m, 6 H), 3.71 (m, 2 H), 4.15 (m, 1 H), 4.39 (s, 1 H), 4.82 (m, 1 H), 4.88 (m, 1 H), 5.31 (d,  $J = 8.4$  Hz, 1 H), 5.59 (d,  $J = 9.2$  Hz, 1 H), 6.02 (m, 1 H), 7.23 (m, 1 H), 7.39 (m, 1 H), 7.75 (m, 1 H), 7.86 (m, 1 H).

#### **Synthesis of 2-debenzoyl-2-(3-methoxybenzoyl)-3'-dephenyl-3'-(2-methylprop-1-enyl)-10-dehydro-7-8-seco-docetaxel (SB-CST-10201).**

To an acetonitrile/pyridine solution (1/1, 17 mL) of **8a** (417 mg, 0.35 mmol) was added HF/pyridine (70%, 4.2 mL) dropwise at 0 °C in an ice/water bath. The mixture was stirred at 0 °C for 1 h and then at room temperature overnight. The reaction mixture was diluted with ethyl acetate (50 mL) and washed with saturated aqueous  $\text{NaHCO}_3$  (2 × 35 mL). The aqueous layers were extracted with ethyl acetate, and the combined organic layers were washed with saturated aqueous  $\text{CuSO}_4$  (2 × 40 mL) and brine (20 mL), and then dried over anhydrous  $\text{MgSO}_4$ . Evaporation of the solvent followed by purification of the crude product by flash chromatography on silica gel (hexane/EtOAc = 3/1 to 1/1) afforded **SB-CST-10201** (202 mg, 71% yield) as a white solid: m.p. 147-149 °C;  $[\alpha]_D^{20}$  -26.90 ( $\text{CHCl}_3$ , c 2.12);  $^1\text{H}$  NMR (500 MHz  $\text{CDCl}_3$ )  $\delta$  7.60 (m, 1 H, 6- $\text{H}_{\text{Ar}}$ ), 7.50 (m, 1 H, 2- $\text{H}_{\text{Ar}}$ ), 7.40 (t, 1 H,  $J = 8$  Hz, 5- $\text{H}_{\text{Ar}}$ ), 7.15 (ddd, 1 H,  $J = 1.2, 3, 8$  Hz, 4- $\text{H}_{\text{Ar}}$ ), 6.48 (s, 1 H, 9-OH), 6.18 (m, 1 H, 13-H), 5.61 (d, 1 H,  $J = 9$  Hz, 2-H), 5.25 (m, 2 H, 5-H, 20-Ha), 4.95 (m, 1 H, NH), 4.80 (m, 1 H, 4'-H), 4.40-4.10 (m, 3 H, 2'-H, 3'-H, 20-Hb),

3.90 (m, 1 H, 7-Ha), 3.85 (s, 3 H, OMe), 3.75 (m, 1 H, 7-Hb), 2.80 (m, 1 H, 14-Ha), 2.60 (m, 1 H, 6-Ha), 2.45 (dd, 1 H,  $J = 9, 15$  Hz, 14-Hb), 2.20 (m, 2 H, 6-Hb, OH), 1.87 (m,  $9^{13}\text{C}$  NMR (125 MHz  $\text{CDCl}_3$ )  $\delta$  191.8 (10-C), 172.8 (1'-C), 170.0 (4-Ac), 167.7 (2-benz.), 160.5 (3-C<sub>Ar</sub>), 156.2 (NCOO), 149.0 (9-C), 142.7 (11-C), 137.1 (12-C), 136.5 (4'-CH), 131.3 (1-C<sub>Ar</sub>), 130.6 (5-CH<sub>Ar</sub>), 125.0 (8-C), 122.4 (5'-C), 121.5 (6-CH<sub>Ar</sub>), 120.0 (4-CH<sub>Ar</sub>), 115.2 (2-CH<sub>Ar</sub>), 87.5 (5-CH), 86.7 (4-C), 81.0 (1-C), 80.7 (C, Boc), 75.5 (20-CH<sub>2</sub>), 75.4 (2-CH), 71.7 (2'-CH), 71.6 (13-CH), 60.3 (7-CH<sub>2</sub>), 56.1 (OMe), 52.0 (3'-CH), 45.5 (3-CH), 43.2 (15-C), 39.1 (6-CH<sub>2</sub>), 37.2 (14-CH<sub>2</sub>), 28.9 (CH<sub>3</sub>, Boc), 26.4 (6'-CH<sub>3</sub>), 25.4 (7'-CH<sub>3</sub>), 22.8 (16-CH<sub>3</sub>), 21.8 (4-Ac), 15.3 (17-CH<sub>3</sub>), 15.0 (18-CH<sub>3</sub>), 14.8 (19-CH<sub>3</sub>). MS-ES<sup>+</sup> ( $m/z$ ) calcd for C<sub>42</sub>H<sub>57</sub>NO<sub>15</sub>H<sup>+</sup> 816.37; found 816.4. HRMS (ES<sup>+</sup>,  $m/z$ ) calcd. for C<sub>42</sub>H<sub>57</sub>NO<sub>15</sub>H<sup>+</sup>, 816.3806; Found, 816.3777 ( $\Delta = 3.5$  ppm).

*In the same manner, C-seco-taxoids, SB-CST-10101, SB-CST-10102, SB-CST-10104; SB-CST-10202 and SB-CST-10204, were synthesized.*

2-Debenzoyl-2-(3-methoxybenzoyl)-3'-dephenyl-3'-(2-methyl-1-propyl)-10-dehydro-7-8-seco-docetaxel (**SB-CST-10101**): 76% yield; white solid; m.p. 147-145 °C;  $[\alpha]_D^{20}$  -28.80 ( $\text{CHCl}_3$ , c 1.98);  $^1\text{H}$  NMR (400 MHz  $\text{CDCl}_3$ )  $\delta$  7.60 (m, 1 H, 6-H<sub>Ar</sub>), 7.50 (m, 1 H, 2-H<sub>Ar</sub>), 7.40 (t, 1 H,  $J = 8$  Hz, 5-H<sub>Ar</sub>), 7.15 (ddd, 1 H,  $J = 1.2, 3, 8$  Hz, 4-H<sub>Ar</sub>), 6.48 (s, 1 H, 9-OH), 6.17 (m, 1 H, 13-H), 5.58 (d, 1 H,  $J = 9$  Hz, 2-H), 5.20 (m, 2 H, 5-H, 20-Ha), 4.80 (bs, 1 H, NH), 4.40 (m, 1 H, 3-H), 4.30-4.05 (m, 4 H, 20-Hb, 2'-H, 3'-H), 3.90 (m, 1 H, 7-Ha), 3.80 (s, 3 H, OMe), 3.70 (m, 1 H, 7-Hb), 3.40 (bs, 1 H, 2'-OH), 2.80 (m, 1 H, 14-Ha), 2.48 (m, 1 H, 6-Ha), 2.40 (dd, 1 H,  $J = 15, 9$  Hz, 14-Hb), 2.24 (m, 1 H, OH), 2.10 (m, 1 H, 6-Hb), 1.88 (s, 3 H, 4-Ac), 1.82 (s, 3 H, 18-CH<sub>3</sub>), 1.78 (s, 3 H, 19-CH<sub>3</sub>), 1.70 (m, 1 H, 5'-H), 1.60 (m, 1 H, 4'-Ha), 1.40 (m, 1 H, 4'-Hb), 1.30 (s, 9 H, Boc), 1.20 (m, 4 H, OH, 17-CH<sub>3</sub>), 1.08 (s, 3 H, 16-CH<sub>3</sub>), 0.95 (d, 6H,  $J = 6$  Hz, 6'-CH<sub>3</sub>, 7'-CH<sub>3</sub>);  $^{13}\text{C}$  NMR (100 MHz  $\text{CDCl}_3$ )  $\delta$  191.4 (10-C), 173.4 (1'-C), 169.3 (4-Ac), 167.4 (2-benz.), 160.0 (3-C<sub>Ar</sub>), 156.1 (NCOO), 149.0 (9-C), 142.4 (11-C), 137.1 (12-C), 130.9 (1-C<sub>Ar</sub>), 130.3 (5-CH<sub>Ar</sub>), 124.6 (8-C), 122.1 (6-CH<sub>Ar</sub>), 119.8 (4-CH<sub>Ar</sub>), 114.9 (2-CH<sub>Ar</sub>), 87.5 (5-CH), 86.3 (4-C), 80.6 (1-C), 80.2 (C, Boc), 75.2 (20-CH<sub>2</sub>), 75.1 (2-CH), 73.8 (2'-CH), 70.6 (13-CH), 60.0 (7-CH<sub>2</sub>), 55.7 (OMe), 51.7 (3'-CH), 44.6 (3-CH), 43.2 (15-C), 40.9 (4'-CH<sub>2</sub>), 37.7 (6-CH<sub>2</sub>), 36.7 (14-CH<sub>2</sub>), 28.4 (CH<sub>3</sub>, Boc), 25.1 (5'-CH), 23.4 (17-CH<sub>3</sub>), 22.4 (6'-CH<sub>3</sub>), 22.4 (7'-CH<sub>3</sub>), 22.3 (4-Ac), 21.4 (16-CH<sub>3</sub>), 15.0 (18-CH<sub>3</sub>), 14.6 (19-CH<sub>3</sub>). MS-ES<sup>+</sup> ( $m/z$ ) calcd for C<sub>42</sub>H<sub>59</sub>NO<sub>15</sub>H<sup>+</sup> 818.4; found 818.5. HRMS (ES<sup>+</sup>,  $m/z$ ) calcd. for C<sub>42</sub>H<sub>59</sub>NO<sub>15</sub>H<sup>+</sup>, 818.3963; Found, 818.3931 ( $\Delta = 3.9$  ppm).

2-Debenzoyl-2-(3-chlorobenzoyl)-3'-dephenyl-3'-(2-methyl-1-propyl)-10-dehydro-7-8-seco-docetaxel (**SB-CST-10102**): 80% yield; white solid; mp. 138-140 °C;  $[\alpha]_D^{20}$  -18.70 ( $\text{CHCl}_3$ , c 0.91);  $^1\text{H}$  NMR (400 MHz  $\text{CDCl}_3$ )  $\delta$  7.96 (m, 2 H, 2-H<sub>Ar</sub>, 6-H<sub>Ar</sub>), 7.58 (d, 1 H,  $J = 8$  Hz, 4-H<sub>Ar</sub>), 7.42 (t,  $J = 8$  Hz, 5-H<sub>Ar</sub>), 6.47 (9-OH), 6.20 (13-H), 5.58 (d,  $J = 9.6$  Hz, 2-H), 5.20 (m, 2 H, 5-H, 20-Ha), 4.80 (m, 1 H, NH), 4.40-4.10 (m, -Hb, 2'-H, 3'-H), 3.90 (m, 1 H, 7-Hb), 3.70 (m, 1 H, 7-Hb), 3.20 (2'-OH), 2.80 (m, 1 H, 14-Ha), 2.55 (m, 1 H, 14-Hb), 2.40 (m, 1 H, 6-Hb), 2.10 (s, 3 H, 4-Ac), 1.88 (s, 3 H, 18-CH<sub>3</sub>), 1.82 (s, 4 H, 6-Hb, 19-CH<sub>3</sub>), 1.65 (m, 1 H, 5'-H), 1.60 (m, 1 H, 4'-Ha), 1.40 (m, 1 H, 4'-Hb), 1.33 (s, 9 H, Boc), 1.09 (s, 6 H, 16-CH<sub>3</sub>, 17-CH<sub>3</sub>), 0.96 (s, 3 H, 6'-CH<sub>3</sub>), 0.95 (s, 3 H, 7'-CH<sub>3</sub>);  $^{13}\text{C}$  NMR (100 MHz  $\text{CDCl}_3$ )  $\delta$  191.3 (10-C), 173.5 (1'-C), 169.1 (4-Ac), 166.3 (2-benz.), 156.0 (NCOO), 149.0 (9-C), 142.3 (11-C), 137.0 (12-C), 135.3 (4-CH<sub>Ar</sub>), 134.0 (3-C<sub>Ar</sub>), 131.3 (1-C<sub>Ar</sub>), 130.6 (2-CH<sub>Ar</sub>), 129.8 (5-CH<sub>Ar</sub>), 128.0 (6-CH<sub>Ar</sub>), 124.3 (8-C), 87.5 (5-CH), 86.4 (4-C), 80.5 (1-C), 79.9 (C, Boc), 75.5 (20-CH<sub>2</sub>), 75.0 (2-CH), 73.6 (2'-CH), 79.6 (13-CH), 60.0 (7-CH<sub>2</sub>), 51.6 (3'-CH), 44.6 (3-CH), 43.2 (15-C), 41.0 (4'-CH<sub>2</sub>), 37.6 (6-CH<sub>2</sub>), 36.7 (14-CH<sub>2</sub>), 28.4 (CH<sub>3</sub>, Boc), 25.1 (5'-CH), 23.4 (17-CH<sub>3</sub>), 22.4 (7'-CH<sub>3</sub>, 6'-CH<sub>3</sub>, 4-Ac), 21.4 (16-CH<sub>3</sub>), 15.0 (18-CH<sub>3</sub>), 14.6 (19-CH<sub>3</sub>). HRMS (ES<sup>+</sup>,  $m/z$ ) calcd. for C<sub>41</sub>H<sub>56</sub>NO<sub>14</sub>ClH<sup>+</sup>, 822.3468; Found, 822.3452 ( $\Delta = 1.9$  ppm).



**2-Debenzoyl-2-(3-fluorobenzoyl)-3'-dephenyl-3'-(2-methyl-1-propyl)-10-dehydro-7-8-seco-docetaxel (SB-CST-10104):** 75% yield; white solid; mp. 139-141 °C;  $[\alpha]_D^{20}$  -20.10 (CHCl<sub>3</sub>, c 1.44); <sup>1</sup>H NMR (400 MHz CDCl<sub>3</sub>) δ 7.90 (m, 1 H, 6-H<sub>Ar</sub>), 7.78 (m, 1 H, 2-H<sub>Ar</sub>), 7.56 (m, 1 H, 4-H<sub>Ar</sub>), 7.41 (m, 1 H, 5-H<sub>Ar</sub>), 6.58 (s, 1 H, 9-OH), 6.20 (m, 1 H, 13-H), 5.50 (d, 1 H, *J* = 9 Hz, 2-H), 5.20 (m, 2 H, 5-H, 20-Ha), 4.80 (m, 1 H, NH), 4.40-4.05 (m, 4 H, 20-Hb, 2'-H, 3'-H, 3-H), 3.90 (m, 1 H, 7-Ha), 3.65 (m, 1 H, 7-Hb), 2.80 (m, 1 H, 14-Ha), 2.50 (m, 2 H, 14-Hb, 6-Ha), 1.90 (m, 9 H, 4-Ac, 18-CH<sub>3</sub>, 19-CH<sub>3</sub>), 1.70 (m, 1 H, 5'-H), 1.60 (m, 1 H, 4'-Ha), 1.40 (m, 1 H, 4'-Hb), 1.30 (s, 9 H, Boc), 1.21 (s, 3 H, 16-CH<sub>3</sub>), 1.10 (s, 3 H, 17-CH<sub>3</sub>), 0.96 (m, 6 H, 7'-CH<sub>3</sub>, 6'-CH<sub>3</sub>); <sup>13</sup>C NMR (100 MHz CDCl<sub>3</sub>) δ 191.3 (10-C), 173.5 (1'-C), 171.4 (4-Ac), 166.3 (2-benz.), 163.0 (d, *J*<sub>CF</sub> = 246 Hz, CF), 156.0 (NCOO), 149.0 (9-C), 142.3 (11-C), 137.2 (12-C), 131.8 (d, *J*<sub>CF</sub> = 7 Hz, 1-C<sub>Ar</sub>), 130.8 (5-CH<sub>Ar</sub>), 125.6 (8-C), 124.4 (6-CH<sub>Ar</sub>), 121.2 (d, *J*<sub>CF</sub> = 21 Hz, 4-CH<sub>Ar</sub>), 116.7 (2-CH<sub>Ar</sub>), 87.5 (5-CH), 86.4 (4-C), 80.5 (1-C), 80.0 (C, Boc), 75.5 (20-CH<sub>2</sub>), 75.4 (2-CH), 73.6 (2'-CH), 70.6 (13-CH), 60.6 (7-CH<sub>2</sub>), 51.6 (3'-CH), 44.6 (3-CH), 43.1 (15-C), 41.0 (4'-CH<sub>2</sub>), (4'-CH<sub>2</sub>), 37.7 (6-CH<sub>2</sub>), 36.8 (14-CH<sub>2</sub>), 28.3 (CH<sub>3</sub>, Boc), 25.0 (5'-CH), 23.3 (17-CH<sub>3</sub>), 22.3 (7'-CH<sub>3</sub>, 6-CH<sub>3</sub>), 21.3 (4-Ac), 21.2 (16-CH<sub>3</sub>), 15.0 (18-CH<sub>3</sub>), 14.4 (19-CH<sub>3</sub>). MS-ES<sup>+</sup> (*m/z*): calcd for C<sub>41</sub>H<sub>56</sub>FNO<sub>14</sub>H<sup>+</sup> 806.37; found 806.4.

**2-Debenzoyl-2-(3-chlorobenzoyl)-3'-dephenyl-3'-(2-methylprop-1-enyl)-10-dehydro-7-8-seco-docetaxel (SB-CST-10202):** 70 % yield; white solid; mp 159-161 °C;  $[\alpha]_D^{21}$  -25.0 (c 1.16 CHCl<sub>3</sub>); <sup>1</sup>H NMR (400 MHz CDCl<sub>2</sub>CDCl<sub>2</sub>, 70 °C) δ 7.99 (m, 1 H, 2-H<sub>Ar</sub>), 7.93 (d, 1 H, *J* = 8 Hz, 6-H<sub>Ar</sub>), 7.61 (m, 1 H, 4-H<sub>Ar</sub>), 7.42 (d, 1 H, *J* = 8 Hz, 5-H<sub>Ar</sub>), 6.15 (m, 1 H, 13-H), 5.59 (d, 1 H, *J* = 9 Hz, 2-H), 5.30 (d, 1 H, *J* = 8 Hz, 5-H), 5.17 (bd, 1 *J* = 10 Hz, NH), 4.90 (d, 1 H, *J* = 9 Hz, 20-Ha), 4.79 (ddd, 1 H, *J* = 3, 9, 9 Hz, 3'-H), 4.36 (bs, 1 H, 3-H), 4.31 (d, 1 H, *J* = 8 Hz, 20-Hb), 4.27 (d, 1 H, *J* = 3 Hz, 2'-H), 3.85 (m, 1 H, 7-Ha), 3.66 (m, 1 H, 7-Hb), 2.85 (bs, 1 H, 14-Ha), 2.48 (dd, 1 H, *J* = 9, 15 Hz, 14-Hb), 2.40 (bs, 1 H, 6-Ha), 2.05 (s, 3 H, 4-Ac), 2.00 (m, 1 H, 6-Hb), 1.95 (s, 3 H, 19-CH<sub>3</sub>), 1.77 (d, 3 H, *J* = 1.2 Hz, 18-CH<sub>3</sub>), 1.37 (s, 9 H, Boc), 1.27 (m, 9 H, 17-CH<sub>3</sub>, 6'-CH<sub>3</sub>, 7'-CH<sub>3</sub>), 1.12 (s, 3 H, 16-CH<sub>3</sub>); <sup>13</sup>C NMR (100 MHz CDCl<sub>2</sub>CDCl<sub>2</sub>, 25 °C) δ 192.7 (10-C), 174.0 (1'-C), 170.6 (4-Ac), 167.5 (2-benz.), 157.4 (NCOO), 150.4 (9-C), 143.6 (11-C), 140.0 (12-C), 138.6 (4'-C), 136.6 (4-CH<sub>Ar</sub>), 135.6 (3-C<sub>Ar</sub>), 132.6 (1-C<sub>Ar</sub>), 132.1 (2-CH<sub>Ar</sub>), 130.9 (5-CH<sub>Ar</sub>), 129.4 (6-CH<sub>Ar</sub>), 125.8 (8-C), 122.5 (5'-C), 88.5 (5-CH), 87.7 (4-C), 82.0 (1-C), 81.7 (C, Boc), 76.9 (20-CH<sub>2</sub>), 76.5 (2-CH), 71.7 (2'-CH), 71.6 (13-CH), 61.2 (7-CH<sub>2</sub>), 53.1 (3'-CH), 46.0 (3-CH), 44.5 (15-C), 39.1 (6-CH<sub>2</sub>), 38.3 (14-CH<sub>2</sub>), 29.9 (CH<sub>3</sub>, Boc), 27.4 (6'-CH<sub>3</sub>), 26.4 (7'-CH<sub>3</sub>), 23.8 (17-CH<sub>3</sub>), 22.8 (4-Ac), 20.4 (16-CH<sub>3</sub>), 16.4 (18-CH<sub>3</sub>), 16.1 (19-CH<sub>3</sub>). HRMS (ES<sup>+</sup>, *m/z*): Calcd. for C<sub>41</sub>H<sub>54</sub>NO<sub>14</sub>ClH<sup>+</sup>, 820.3311; Found, 820.3316 (Δ = 0.6 ppm).

**2-Debenzoyl-2-(3-fluorobenzoyl)-3'-dephenyl-3'-(2-methylprop-1-enyl)-10-dehydro-7-8-seco-docetaxel (SB-CST-10204):** 73% yield; white solid; mp 148-150 °C; <sup>1</sup>H NMR (400 MHz, CDCl<sub>3</sub>) δ 1.08 (s, 4 H), 1.21 (s, 4 H), 1.25 (s, 3 H), 1.34 (s, 9 H), 1.44 (m, 1 H), 1.73 (m, 8 H), 1.85 (m, 8 H), 2.09 (m, 3 H), 2.45 (m, 2 H), 2.80 (m, 1 H), 3.67 (m, 1 H), 3.88 (s, 1 H), 4.24 (d, *J* = 4.0 Hz, 1 H), 4.28 (d, *J* = 7.6 Hz, 1 H), 4.76 (m, 1 H), 4.98 (s, 1 H), 5.18 (m, 2 H), 5.26 (d, *J* = 9.0 Hz, 1 H), 5.59 (d, *J* = 7.0 Hz, 1 H), 6.14 (m, 1 H), 6.50 (s, 1 H), 7.31 (dt, *J* = 10.5 Hz, 3.5 Hz, 1 H), 7.45 (m, 1 H), 7.67 (d, *J* = 7.2 Hz, 1 H), 7.80 (d, *J* = 7.2 Hz, 1 H); <sup>13</sup>C NMR (100.5 MHz, CDCl<sub>3</sub>) δ 10.0, 14.1, 14.7, 18.6, 21.1, 22.1, 22.6, 25.7, 28.2, 29.6, 31.5, 36.5, 42.9, 51.4, 59.5, 70.1, 74.5, 75.2, 79.9, 86.1, 116.6, 120.8, 121.0, 124.1, 125.2, 130.7, 131.5, 131.6, 142.0, 148.8, 155.7, 157.9, 161.4, 163.9, 166.0, 169.0, 172.4, 191.1, 202.4. HRMS (FAB/DCM/NaCl) *m/z* calcd. for C<sub>41</sub>H<sub>54</sub>FNO<sub>14</sub>H<sup>+</sup> 804.3607; found 804.3605 (Δ = -0.2 ppm).

## References

1. Appendino, G.; Noncovich, A.; Bettoni, P.; Dambruoso, P.; Sterner, O.; Fontana, G.; Bombardelli, E., *Eur. J. Org. Chem.* **2003**, 4422-4431.
2. Ojima, I.; Slater, J. C.; Kuduk, S. D.; Takeuchi, C. S.; Gimi, R. H.; Sun, C.-M.; Park, Y. H.; Pera, P.; Veith, J. M.; Bernacki, R. J., *J. Med. Chem.* **1997**, *40* (3), 267-278.
3. Ojima, I.; Sun, C. M.; Park, Y. H., *J. Org. Chem.* **1994**, *59* (6), 1249-1250.
4. Ojima, I.; Wang, T.; Miller, M. L.; Lin, S.; Borella, C. P.; Geng, X.; Pera, P.; Bernacki, R. J., *Bioorg. Med. Chem. Lett.* **1999**, *9*, 3423-3428.
5. Kuznetsova, L. V.; Pepe, A.; Ungureanu, I. M.; Pera, P.; Bernacki, R. J.; Ojima, I., *J. Fluorine Chem.* **2008**, *129* (9), 817-828.

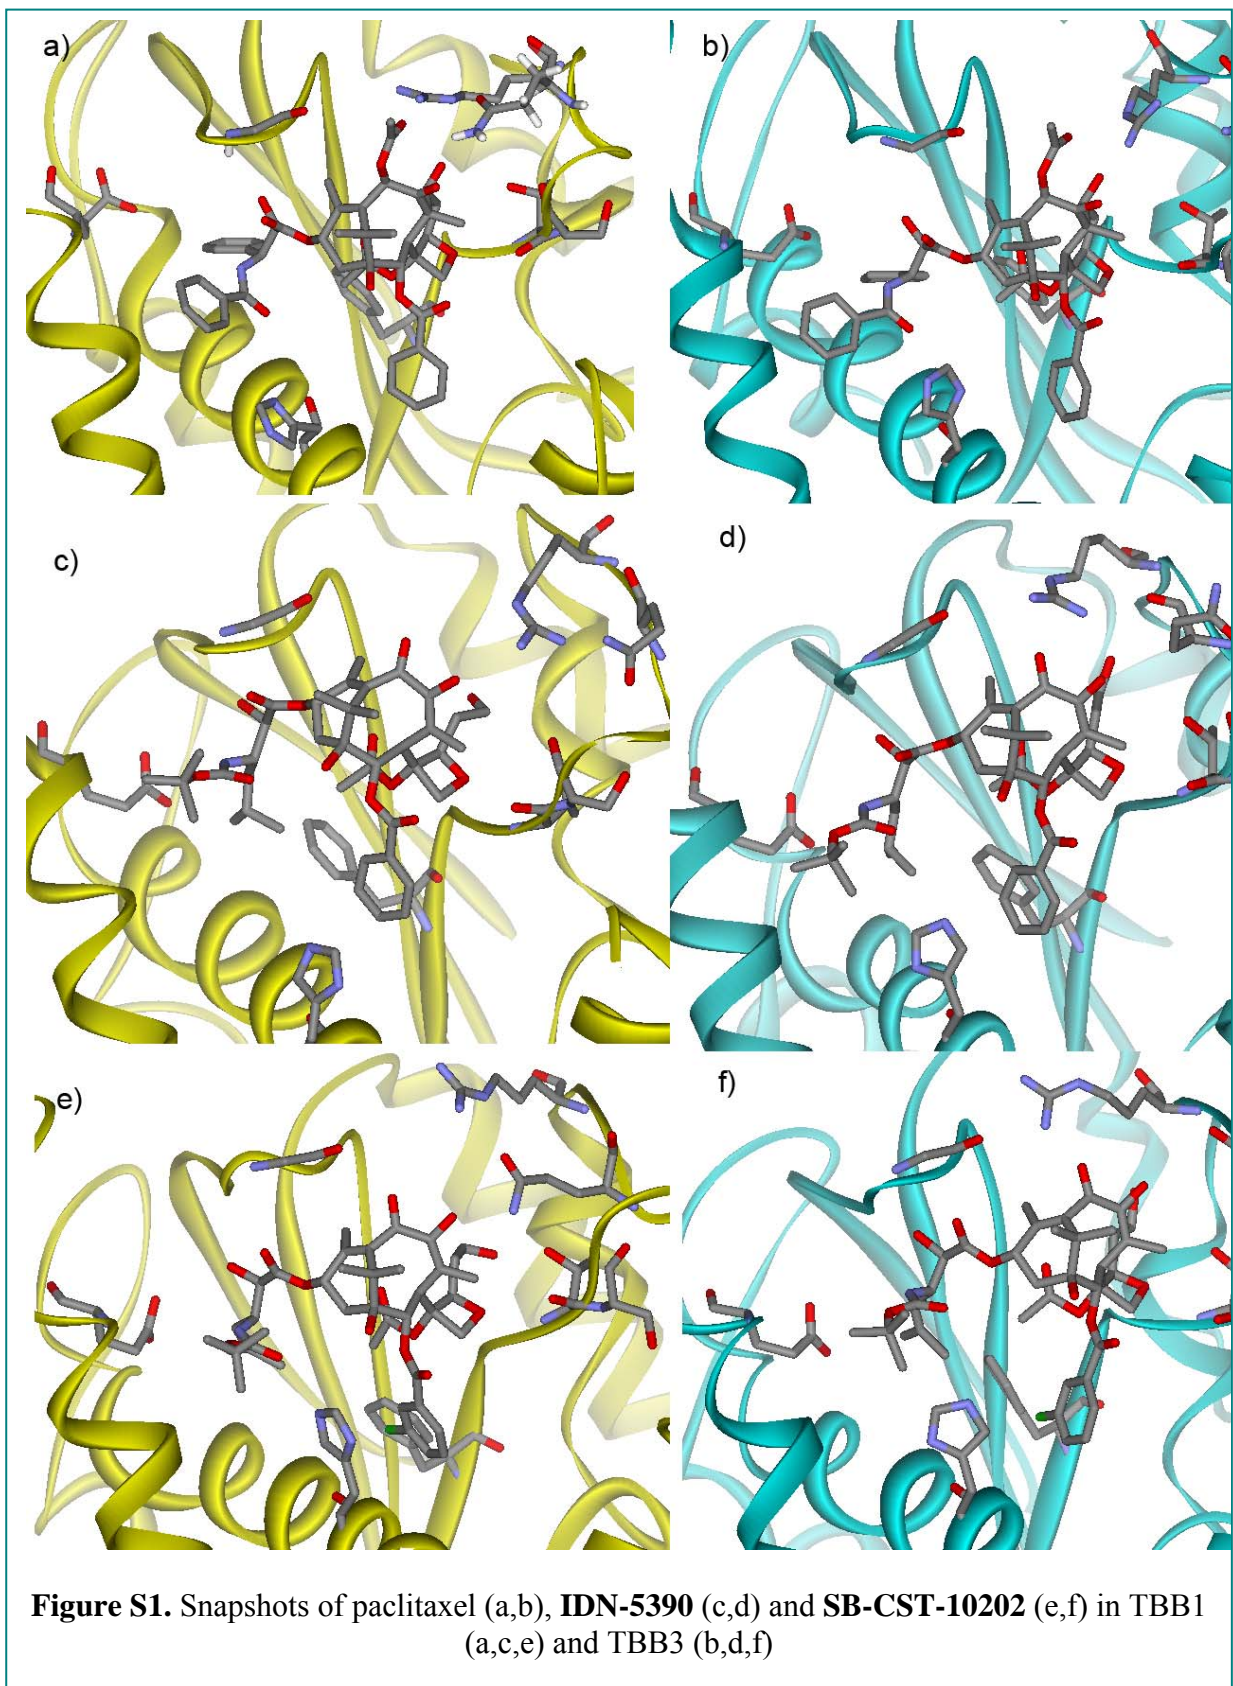

Supplement: NIHMS112309-supplement-01.pdf [file NIHMS112309-supplement-01.pdf]
